# Supplementary material for: RAD genotyping reveals fine-scale population structure and provides evidence for adaptive divergence in a commercially important fish from the northwestern Pacific Ocean
Source: PeerJ journal article supplement (doi:10.7717/peerj.7242), 2019-07-03

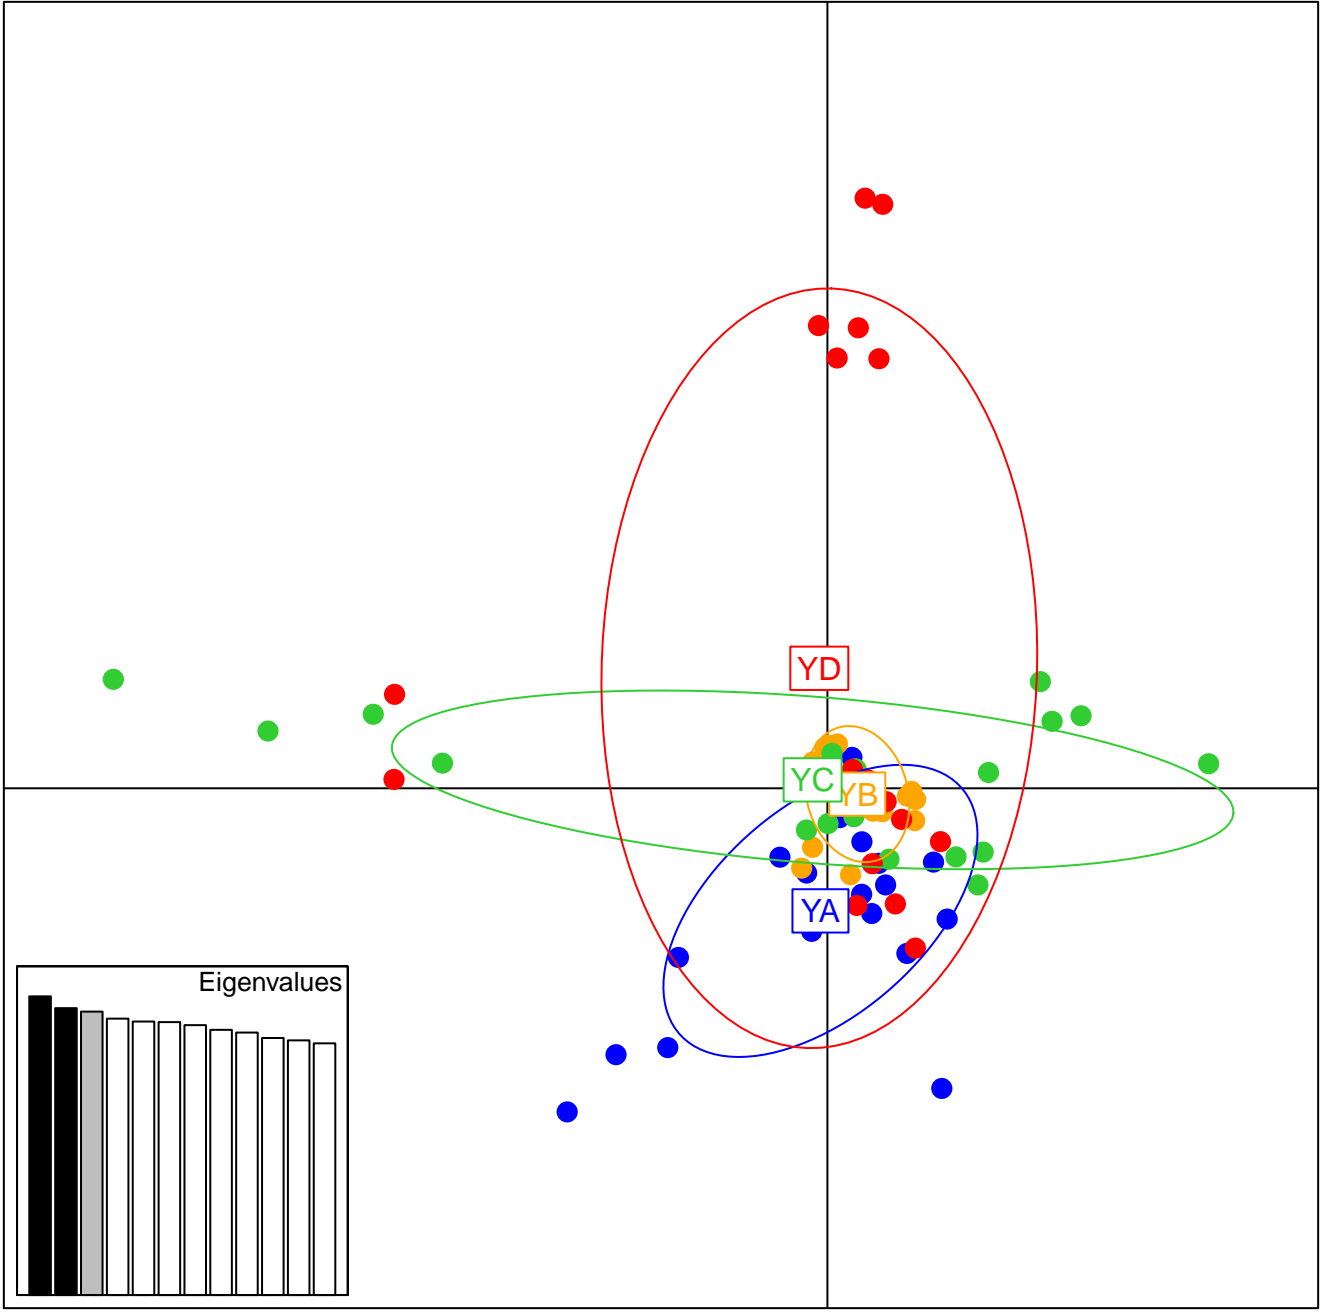

Supplement: Figure-S2.pdf [file Figure-S2.pdf]
